# Supplementary material for: Suppression of spin–spin coupling in nitroxyl biradicals by supramolecular host–guest interactions
Source: Royal Society of Chemistry journal article supplement (doi:10.1039/c0cc02587a), 2010-01-01
Supplement: c0cc02587a.pdf [file c0cc02587a.pdf]

## Electronic Supporting Information

### Suppression of spin-spin coupling in nitroxyl biradicals by supramolecular host-guest interactions

Mintu Porel,<sup>a</sup> M. Francesca Ottaviani,<sup>b</sup> Steffen Jockusch,<sup>c</sup> Nithyanandhan Jayaraj,<sup>a</sup>  
N. J. Turro<sup>c</sup> and V. Ramamurthy<sup>a</sup>

<sup>a</sup> Department of Chemistry, University of Miami, Coral Gables, FL, 33124, USA

<sup>b</sup> Department of Geological Sciences, Chemical and Environmental Technologies (GeoTeCA)  
University of Urbino, Campus ex-Sogesta, Loc. Crocicchia, 61029 Urbino, Italy

<sup>c</sup> Department of Chemistry, Columbia University, New York, NY 10027, USA

| Content   |                                                                                                                                                           | Page |
|-----------|-----------------------------------------------------------------------------------------------------------------------------------------------------------|------|
| Figure S1 | Dimensions of the hosts investigated                                                                                                                      | S2   |
| Figure S2 | <sup>1</sup> H NMR spectra of <b>4</b> (a) in CDCl <sub>3</sub> (b) in D <sub>2</sub> O and (c) <b>4</b> @CB8                                             | S3   |
| Figure S3 | EPR spectra and their simulations for (a) <b>4</b> in water, (b) <b>4</b> /CB8 (1:1), (c) <b>4</b> /CB8 (1:2), and (d) <b>4</b> /CB8 (1:3)                | S4   |
| Figure S4 | <sup>1</sup> H NMR spectra of <b>5</b> (a) in D <sub>2</sub> O and (b) <b>5</b> @CB8                                                                      | S5   |
| Figure S5 | Partial <sup>1</sup> H NMR titration spectra of <b>5</b> with CB8                                                                                         | S6   |
| Figure S6 | EPR spectra of <b>3</b> in (a) 50 % MeOH/H <sub>2</sub> O, (b) <b>3</b> /CB8 in H <sub>2</sub> O (1/0.5), and (c) <b>3</b> /CB8 (1/1) in H <sub>2</sub> O | S7   |
| Figure S7 | EPR spectra of <b>1</b> and <b>2</b> complexes with CB8                                                                                                   | S7   |
| Figure S8 | EPR spectra and their simulations for <b>3</b> within different hosts                                                                                     | S8   |

|            |                                                                                                                          |         |
|------------|--------------------------------------------------------------------------------------------------------------------------|---------|
| Figure S9  | Comparison of hyperfine splitting and rotational correlation time of <b>3</b> in absence and presence of different hosts | S9      |
|            | Experimental Section                                                                                                     | S10-S14 |
| Figure S10 | $^1\text{H}$ NMR of <b>4</b> in $\text{CDCl}_3$                                                                          | S15     |
| Figure S11 | $^1\text{H}$ NMR of <b>5</b> in $\text{CDCl}_3$                                                                          | S16     |
| Figure S12 | $^1\text{H}$ NMR of benzyl-4-(1,2,2,6,6-pentamethylpiperidiny)phthalate in $\text{CDCl}_3$                               | S17     |
| Figure S13 | $^1\text{H}$ NMR of mono-4-(1,2,2,6,6-pentamethylpiperidiny)phthalate in $\text{CDCl}_3$                                 | S18     |
|            | References                                                                                                               | S19     |

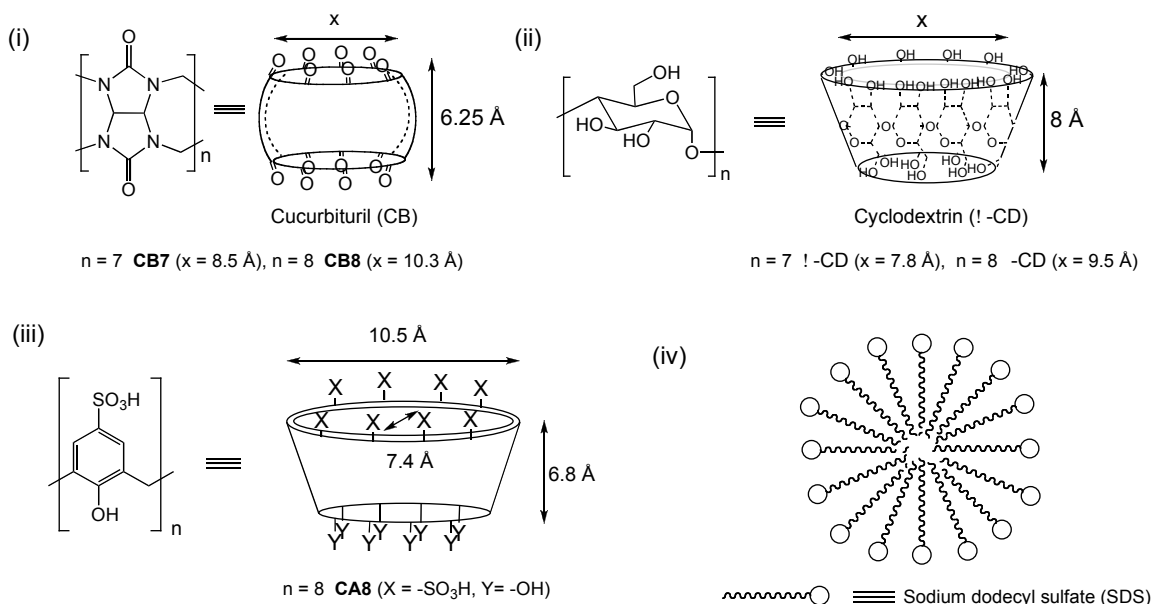

**Figure S1** Investigated host structures. Dimensions of the hosts refer to atom-to-atom distance and do not include Van der Waals radii.

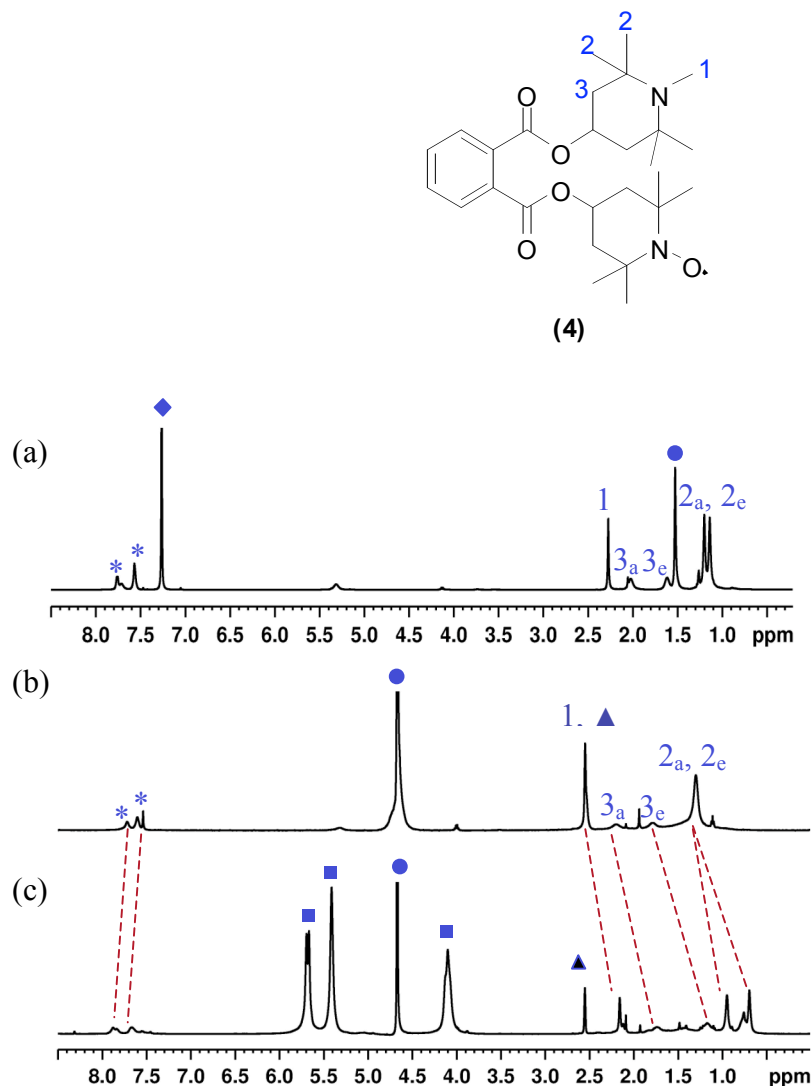

**Figure S2**  $^1\text{H}$  NMR spectra of **4** (a) in  $\text{CDCl}_3$  (1mM, 500 MHz) (b) in  $\text{D}_2\text{O}$  (1mM, 500 MHz) and (c) **4**@CB8, (H:G = 1:1, [4] = 1 mM, (500 MHz). Aliphatic guest resonances are represented with label 1-3 and aromatic guest protons are represented with label “\*”. The labels ‘a’ and ‘e’ represent axial and equatorial resonances. Host resonances are represented with label “■”. The subscript ‘a’ and ‘e’ describes the ‘axial’ and ‘equatorial’ position in the piperidine moiety. The labels “◆”, “▲” and “●” represent the residual  $\text{CHCl}_3$ , DMSO and  $\text{H}_2\text{O}$  resonances respectively.

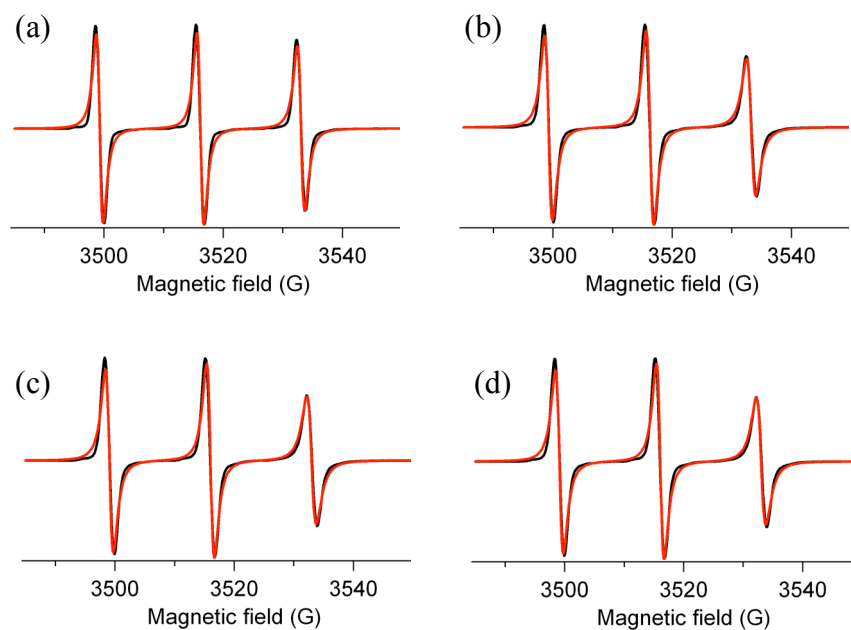

**Figure S3** EPR spectra (black lines) and their simulations (red lines) for (a) **4** in water (1 mM),  $A_N = 16.9$  G,  $\tau_c = 0.042$  ns (b) **4**/CB8 (1:1),  $A_N = 17$  G,  $\tau_c = 0.11$  ns and (c) **4**/CB8 (1:2),  $A_N = 16.9$  G,  $\tau_c = 0.14$  ns and (d) **4**/CB8 (1:3),  $A_N = 16.9$  G,  $\tau_c = 0.14$  ns.

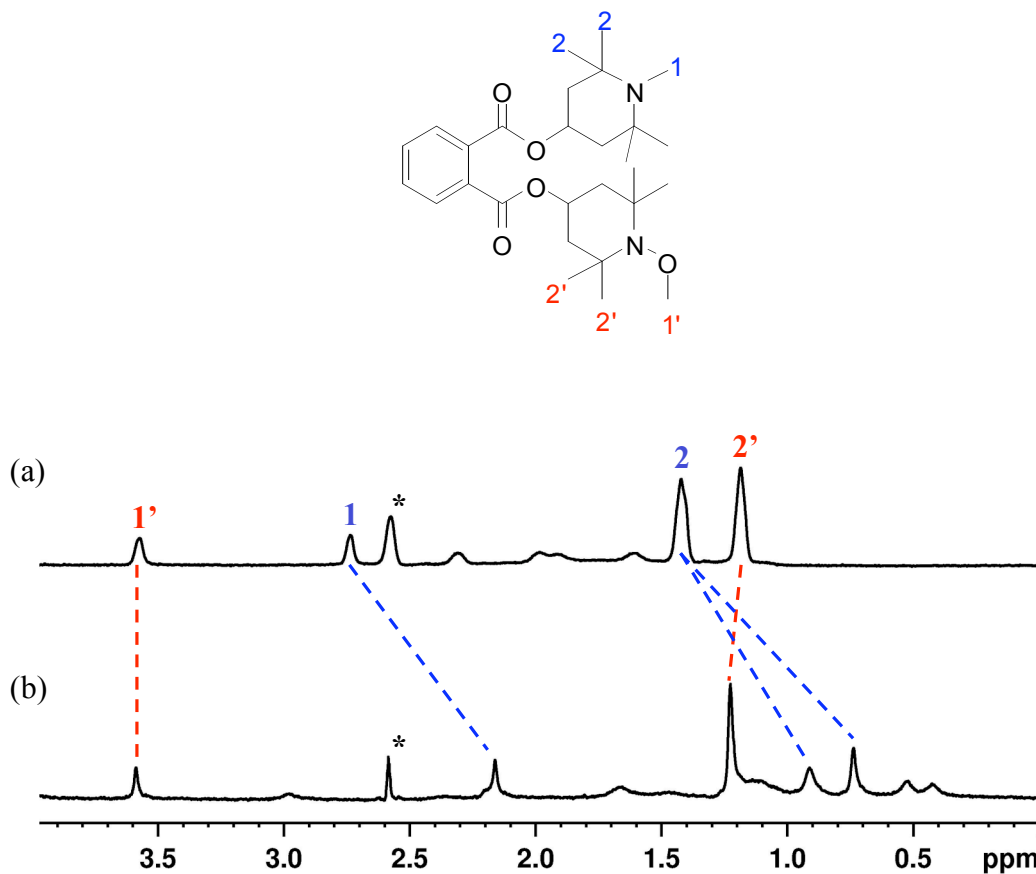

**Figure S4.** Partial  $^1\text{H}$  NMR spectra of **5** (a) in  $\text{D}_2\text{O}$  (0.5 mM, 500 MHz) and (b) **5**@ CB8 (H:G = 1:1, [**5**] = 0.5 mM, (500 MHz). The label “\*” represents residual DMSO resonance. Stock solution of guest was prepared in DMSO.

**Note:** It was observed that in presence of 1 eq. of CB8, -NOMe group of **5** was not upfield shifted whereas -NMe group is upfield shifted. This observation suggests that only piperidine moiety with N-Me group is encapsulated within CB8 whereas -NOMe resides in water.

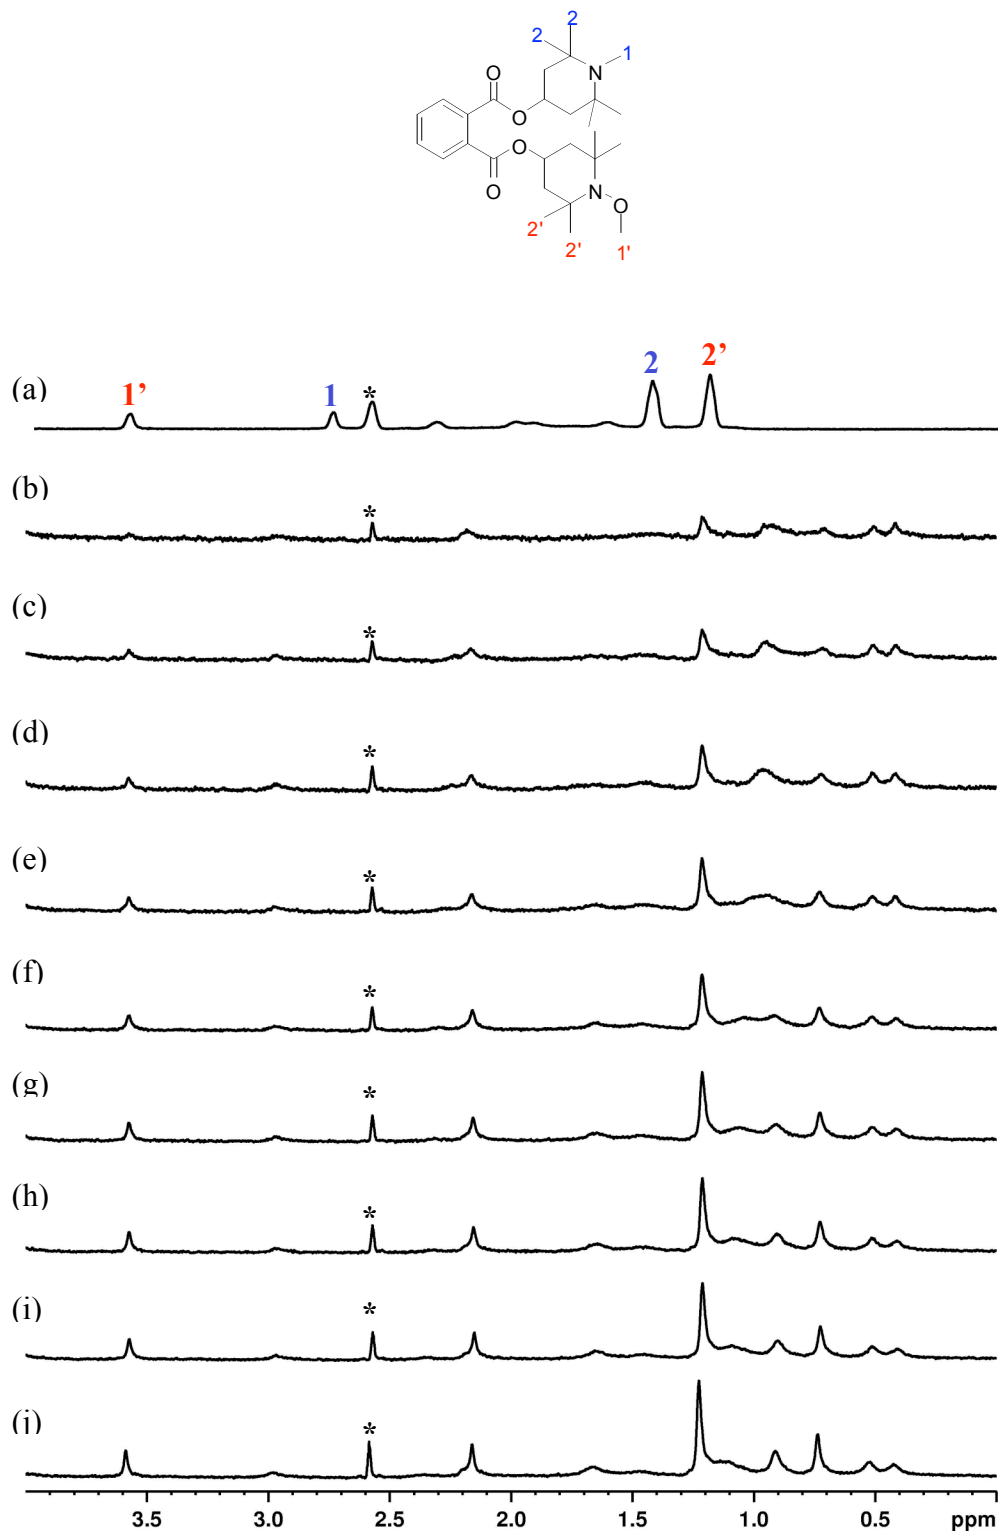

**Figure S5.** Partial  $^1\text{H}$  NMR spectra of **5** (a) in  $\text{D}_2\text{O}$  (0.5 mM, 500 MHz) and (b) **5**:CB8 (1:0.1), (c) **5**:CB8 (1:0.2), (d) **5**:CB8 (1:0.3), (e) **5**:CB8 (1:0.4), (f) **5**:CB8 (1:0.5), (g) **5**:CB8 (1:0.6), (h) **5**:CB8 (1:0.7), (i) **5**:CB8 (1:0.8) and (j) **5**:CB8 (1:1),  $[\mathbf{5}] = 0.5$  mM, (500 MHz). The label “\*” represents residual DMSO resonance.

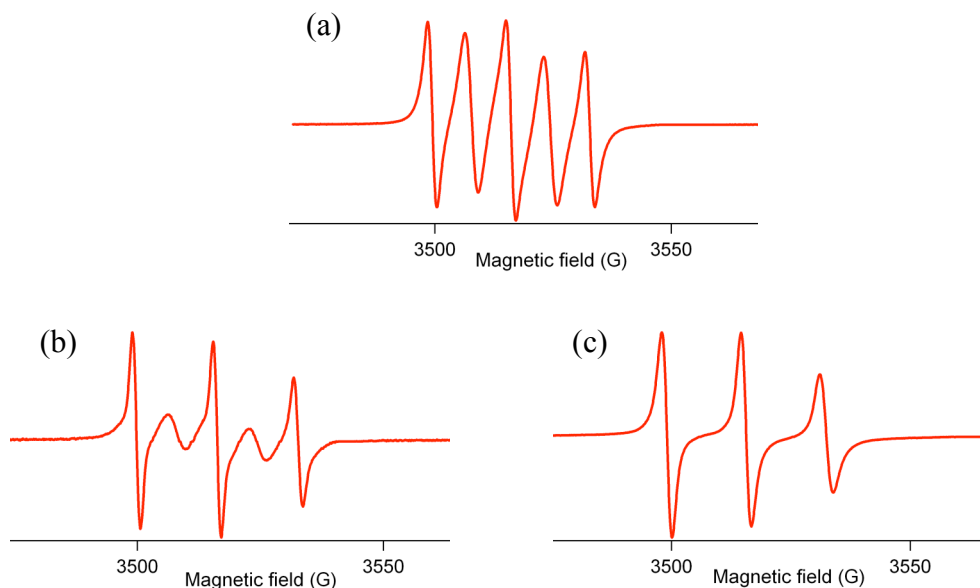

**Figure S6.** EPR spectra of (a) **3** in 50% MeOH/water, signal intensity by double integration =  $1.42 \times 10^8$ , (b) **3**/CB8 (1/0.5) in water, signal intensity by double integration =  $1.46 \times 10^8$  and (c) **3**/CB8 (1/1) in water, signal intensity by double integration =  $1.46 \times 10^8$ , [**3**] = 0.1 mM.

**Note:** Because the signal intensities (from double integration of the EPR signal) of **3** in the absence and presence of CB8 are identical within experimental error, no nitroxyl groups in **3** are “lost” due to chemical reaction in the presence of CB8. It confirms that the change of five-line EPR spectra in solution to three-line EPR spectra in presence of 1 equivalent CB8 is only because of the restriction of spin-spin exchange between two radicals upon encapsulation. Spin-spin exchange gradually decreases with increase of CB8 concentration and stops completely in presence of 1 eq. of CB8.

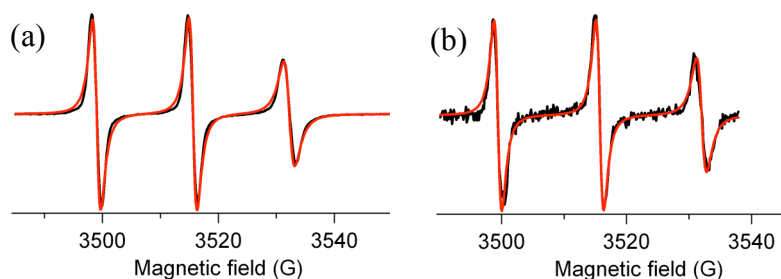

**Figure S7** EPR spectra (black lines) and their simulations (red lines) for (a) **2**/CB8 (1:2),  $A_N = 16.6$  G,  $\tau_c = 0.22$  ns and (b) **1**/CB8 (1:2),  $A_N = 16.3$  G,  $\tau_c = 0.27$  ns.

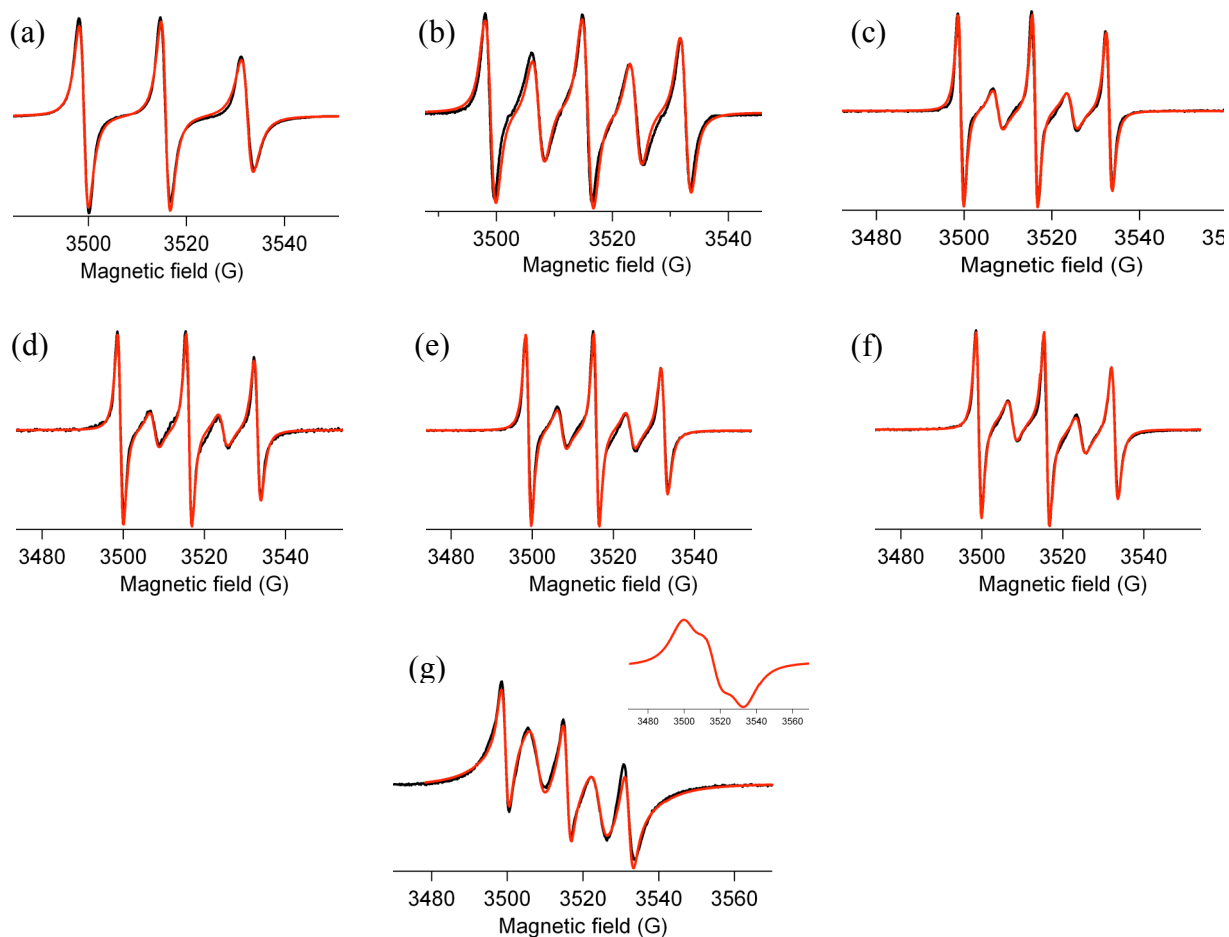

**Figure S8** EPR spectrum (black lines) and its simulation (red lines) for (a) **3** /CB8 (1:2),  $A_N = 16.7$  G,  $\tau_c = 0.24$  ns, (b) **3** /CB7 (1:1),  $A_N = 16.9$  G,  $\tau_c = 0.07$  ns, (c) **3** /CB7 (1:2),  $A_N = 16.9$  G,  $\tau_c = 0.06$  ns, (d) **3** /CA8 (1:2),  $A_N = 16.9$  G,  $\tau_c = 0.1$  ns, (e) **3** / $\beta$ -CD (1:2),  $A_N = 16.7$  G,  $\tau_c = 0.15$  ns, (f) **3** / $\gamma$ -CD (1:2),  $A_N = 16.8$  G,  $\tau_c = 0.12$  ns, (g) **3** @ SDS,  $[3] = 0.1$  mM,  $[SDS] = 200$  mM,  $A_N = 16.3$  G,  $\tau_c = 0.12$  ns, in the insert (44% on the total):  $\omega_{\text{exchange}} = 2 \times 10^8 \text{ s}^{-1}$ ; line width = 3 G. From (a) to (f),  $[3] = 1 \text{ mM}$ .

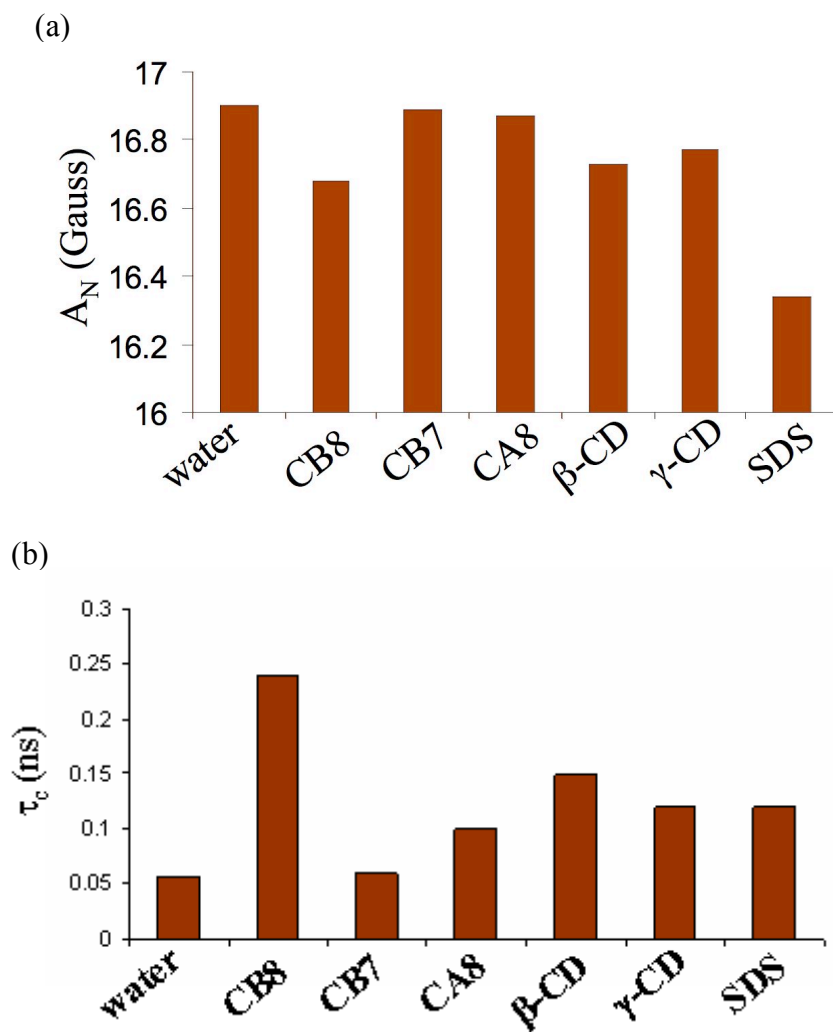

**Figure S9** Comparison of (a) hyperfine splitting ( $A_N$ ) and (b) rotational correlation time ( $\tau_c$ ) of **3** in absence and presence of different hosts.

## Experimental section:

*Materials and Methods:* Cucurbit[7]uril (CB7) and cucurbit[8]uril (CB8) were synthesized by following a published procedure<sup>1</sup>.  $\beta$ -cyclodextrin ( $\beta$ -CD) and  $\gamma$ -cyclodextrin ( $\gamma$ -CD) were purchased from Sigma-Aldrich. Calixarene[8]octa sulfonic acid (CA8) was synthesized from the published procedure<sup>2,3,4</sup>.

*Synthesis of the compounds used in the study:*

### Compound 1:

Terephthalic acid (0.3 g) was mixed with 4-hydroxy-2,2,6,6-tetramethyl piperidine-N-oxyl (0.8 g) and DMAP (cat.) in dry dichloromethane (20 mL) at 0 °C. A suspension of EDCI (0.83 g) in dichloromethane was added to the above reaction mixture at 0 °C, it was allowed to warm up to rt and stirred for 15 h. The reaction mixture was washed with water and dried over Na<sub>2</sub>SO<sub>4</sub> and purified by column chromatography to afford the corresponding <sup>14</sup>N-*para*-<sup>14</sup>N biradical (**1**).

FAB-MS (m/z): 475 (M + H)<sup>+</sup>

By comparing the EPR signal intensity (double integrating the EPR spectra) of the known concentration of the compound against a standard solution of 4-hydroxy TEMPO (1 mM in EtOH), the purity was ascertained.

**Compound 2:** A similar procedure was followed as described for compound **1** with isophthalic acid to afford the <sup>14</sup>N-*meta*-<sup>14</sup>N biradical (**2**).

**Compound 3:** <sup>14</sup>N-*ortho*-<sup>14</sup>N biradical (**3**) was synthesized by following the procedure reported in the literature.<sup>5</sup>

**Compounds 4 and 5:**

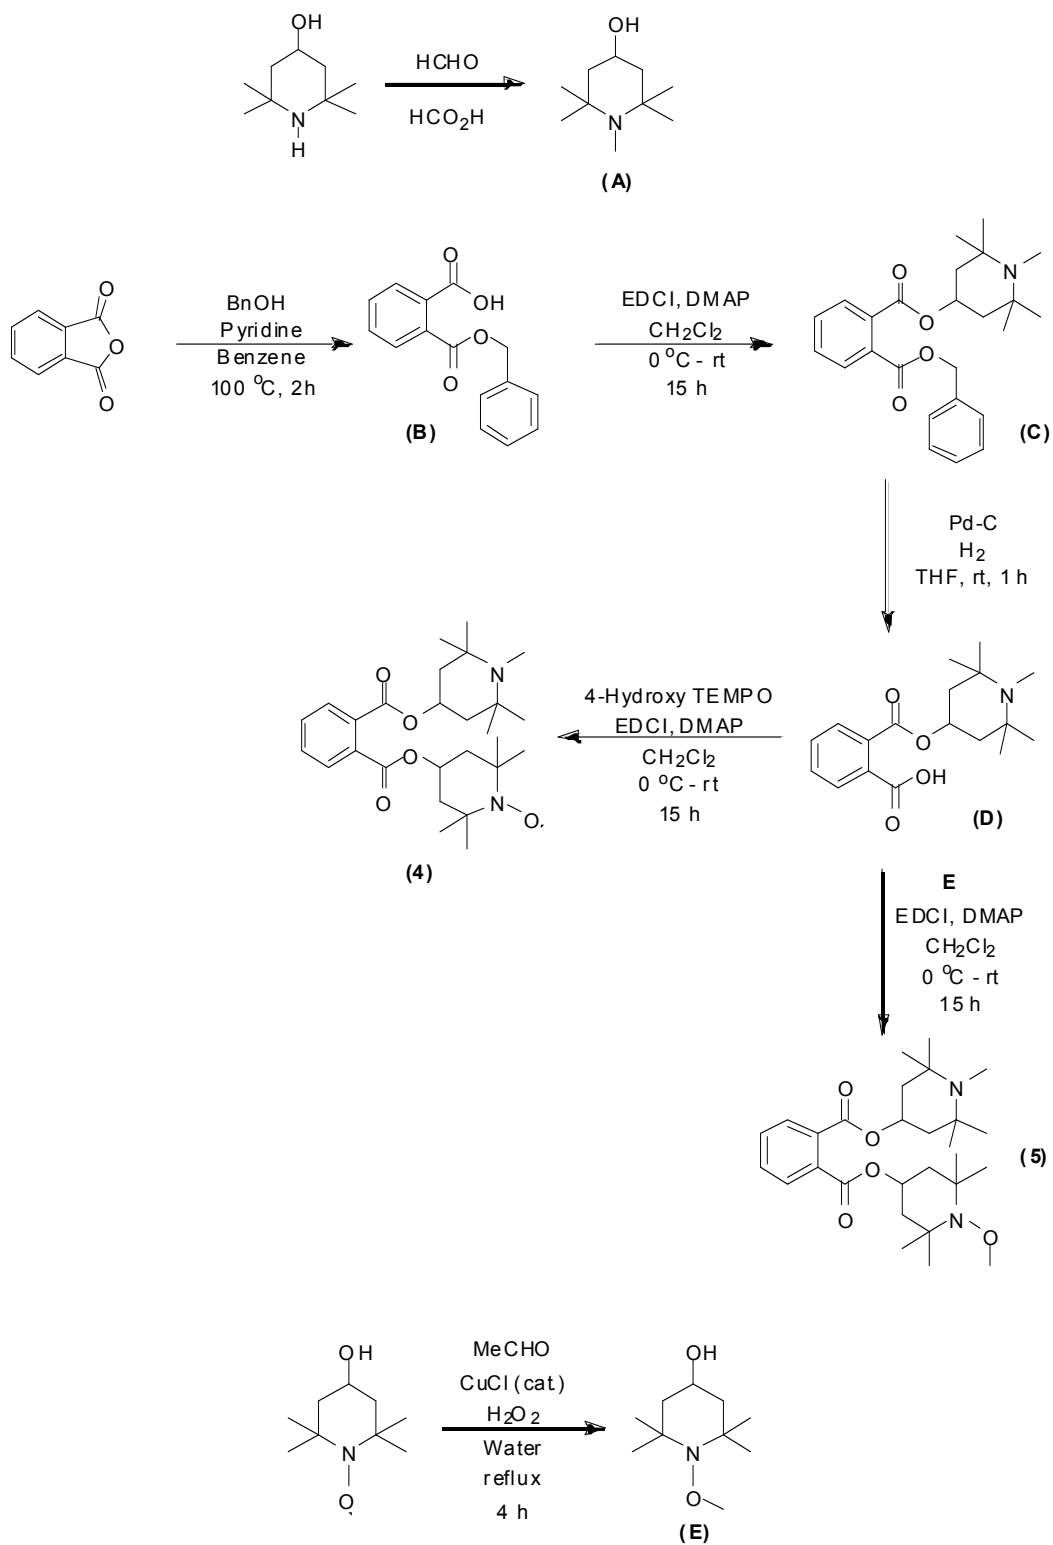

**Scheme S1.** Synthesis of compounds **4** and **5**.

**1,2,2,6,6-Pentamethylpiperidine-4-ol (A):**

2,2,6,6-Tetramethylpiperidine-4-ol (1.5 g) was mixed with 2 mL of formalin (37 % formaldehyde) solution and 0.5 mL of formic acid and refluxed for 7 h. The solution was poured in to ice and the solution was made basic with KOH and extracted with diethyl ether to afford the required 1,2,2,6,6-pentamethylpiperidine-4-ol (**A**) in 85 % yield.

$^1\text{H}$  NMR (500 MHz,  $\text{CDCl}_3$ )  $\delta$ : 1.01 (6 H, s), 1.15 (6 H, s), 1.36 (dd, 2 H), 1.83 (d, 2 H), 2.22 (3 H, s) 3.91 (1 H, m);  $^{13}\text{C}$  NMR (125 MHz,  $\text{CDCl}_3$ )  $\delta$ : 20.54, 28.04, 33.28, 50.06, 55.34, 63.91. GC-MS (m/z): 171 ( $\text{M}^+$ , 10 %), 156 (M-15, 100 %).

**Mono-benzyl-phthalate (B):**

A solution containing 10 mmol of benzylalcohol and phthalicanhydride in 10 mL of pyridine and 50 mL of benzene was heated at 100 °C for 2 h. The reaction mixture was cooled and poured in to ice-water mixture, acidified with conc. HCl and extracted with  $\text{CHCl}_3$  and washed with 5% aqueous sodium carbonate solution. The aqueous solution was further acidified with conc. HCl and extracted with  $\text{CHCl}_3$  to afford the required mono-benzyl-phthalate in quantitative yield.

$^1\text{H}$  NMR (500 MHz,  $\text{CDCl}_3$ )  $\delta$ : 5.37 (2 H, s), 7.29 – 7.9 (9 H, m);  $^{13}\text{C}$  NMR (125 MHz,  $\text{CDCl}_3$ )  $\delta$ : 67.9, 128.45, 128.56, 128.63, 128.87, 129.9, 129.97, 130.94, 132.36, 133.24, 135.24, 167.95, 172.32.

**Benzyl-4-(1,2,2,6,6-pentamethylpiperidiny) phthalate (C):** Mono-benzyl-phthalate (0.68 g) was mixed with 1,2,2,6,6-pentamethylpiperidine-4-ol (0.35 g) and DMAP (cat.) in dry dichloromethane (20 mL) at 0 °C. A suspension of EDCI (0.55 g) in dichloromethane was added to the above reaction mixture at 0 °C, it was allowed to warm up to rt and stirred for 15 h. The reaction mixture was diluted with chloroform, washed with water and dried over  $\text{Na}_2\text{SO}_4$ . The crude reaction mixture was purified by column chromatography to afford the product **C** in 60 % yield.

$^1\text{H}$  NMR (500 MHz,  $\text{CDCl}_3$ )  $\delta$ : 1.09 (6 H, s), 1.17 (6 H, s), 1.70 (dd, 2 H), 1.94 (d, 2 H), 2.26 (3 H, s), 5.26 (1 H, m), 5.37 (2H, s), 7.36-7.73 (9 H, m);  $^{13}\text{C}$  NMR (125 MHz,  $\text{CDCl}_3$ )  $\delta$ : 20.71, 28.02, 33.25, 45.58, 55.34, 67.43, 69.38.

**Mono-4-(1,2,2,6,6-pentamethylpiperidiny)phthalate (D):** The compound **C** was dissolved in THF and degassed with nitrogen for 15 min, charged with Pd-C (5 % on carbon, 10 % by weight) cautiously and purged with hydrogen gas for 1 h, Pd-C was removed by filtration over celite pad and the solution was concentrated to give the product in quantitative yield.

<sup>1</sup>H NMR (500 MHz, CDCl<sub>3</sub>)  $\delta$ : 1.38 (6 H, s), 1.56 (6 H, s), 2.26 (dd, 2 H), 2.44 (dd, 2 H), 2.68 (3 H, s), 5.34 (1 H, m), 7.36-7.77 (4 H, m); <sup>13</sup>C NMR (125 MHz, CDCl<sub>3</sub>)  $\delta$ : 22.72, 28.96, 41.99, 46.27, 63.59, 65.95, 129.06, 129.18, 131.53, 133.52, 134.04, 139.08, 169.14, 171.12.

**4-(2,2,6,6-tetramethylpiperidine-N-oxyl)-4-(1,2,2,6,6-pentamethylpiperidiny)phthalate (4):** Compound **D** (0.22 g) was mixed with 4-hydroxy TEMPO (0.16 g) and DMAP (cat.) in dry dichloromethane (15 mL) at 0 °C. A suspension of EDCI (0.19 g) in dichloromethane was added to the above reaction mixture at 0 °C and stirred at rt for 15 h, washed with water and dried over Na<sub>2</sub>SO<sub>4</sub>. The crude reaction mixture was purified by column chromatography to afford the product **4** in 50 % yield. FAB-MS (m/z): 473 (M<sup>+</sup>) By comparing the EPR signal intensity (double integrating the EPR spectra) of the known concentration of the compound against a standard solution of 4-hydroxy TEMPO (1 mM in EtOH), the purity was ascertained.

<sup>1</sup>H NMR (500 MHz, CDCl<sub>3</sub>)  $\delta$ : 1.14 (6 H, s), 1.2 (3 H, s), 1.62 (2H, s), 2.0 (2H, s), 5.32 (1H, s), 7.57 (2H, s), 7.76 (2H, s).

**4-(1-Methoxy-2,2,6,6-tetramethylpiperidiny)-4-(1,2,2,6,6-pentamethylpiperidiny)phthalate (5):** Compound **D** (0.3 g) was mixed with compound 1-Methoxy-2,2,6,6-tetramethylpiperidin-4-ol (**E**) (0.19 g) and DMAP (cat.) in dry dichloromethane (15 mL) at 0 °C.<sup>6</sup> A suspension of EDCI (0.23 g) in dichloromethane was added to the above reaction mixture at 0 °C and stirred at rt for 15 h, washed with water and dried over Na<sub>2</sub>SO<sub>4</sub>. The crude reaction mixture was purified by column chromatography to afford the product **5** in 37 % yield.

<sup>1</sup>H NMR (500 MHz, CDCl<sub>3</sub>)  $\delta$ : 1.14 (6 H, s), 1.2 (3 H, s), 1.14 (6 H, s), 1.23 (6 H, s), 1.24 (6 H, s), 1.63 (4H, m), 2.0 (4H, dd), 2.27 (3H, s), 3.62 (3H, s), 5.28 (2H, m), 7.52

(2H, s), 7.69 (2H, s);  $^{13}\text{C}$  NMR (125 MHz,  $\text{CDCl}_3$ )  $\delta$ : 21.09, 21.18, 28.45, 30.11, 33.49, 33.69, 44.35, 46.16, 55.71, 60.41, 65.89, 68.55, 69.63, 76.99, 129.22, 131.21, 131.3, 133.02, 167.46

*Preparation of host/guest complex:* Stock solution (20 mM) of guest was prepared in  $\text{CHCl}_3$ . Host stock solution (5 mM) was prepared in  $\text{H}_2\text{O}$ . Required amount of guest solution in  $\text{CHCl}_3$  was added in a vial and the solvent was evaporated by shaking in a mechanical shaker. Then calculated amount of host solution and water were added and shaken by the mechanical shaker for 15 h. The same procedure was adopted for all guests.

*EPR study:* EPR spectra were recorded at room temperature in Bruker EMX spectrometer at 9.5 GHz (X band) employing 100 KHz of field modulation frequency. Spectrometer setting: Power, 1.997 mW; amplitude modulation, 0.50 G; time constant, 163.84 ms; conversion time, 163.84 ms. Samples were loaded to quartz (CFQ) EPR tubes from Wilmad LabGlass (2 mm OD, 0.5 mm wall thickness, 10 cm height) for the EPR experiments

*Protocol for NMR study:* A  $^1\text{H}$  NMR spectrum of 600  $\mu\text{L}$  of 1 mM CB8 in  $\text{D}_2\text{O}$  was recorded. To this solution 1 equivalent of guest (10  $\mu\text{L}$  of 60 mM solution of **4** in DMSO) was added. The mixture was shaken well for about 5 min and the spectra were recorded.

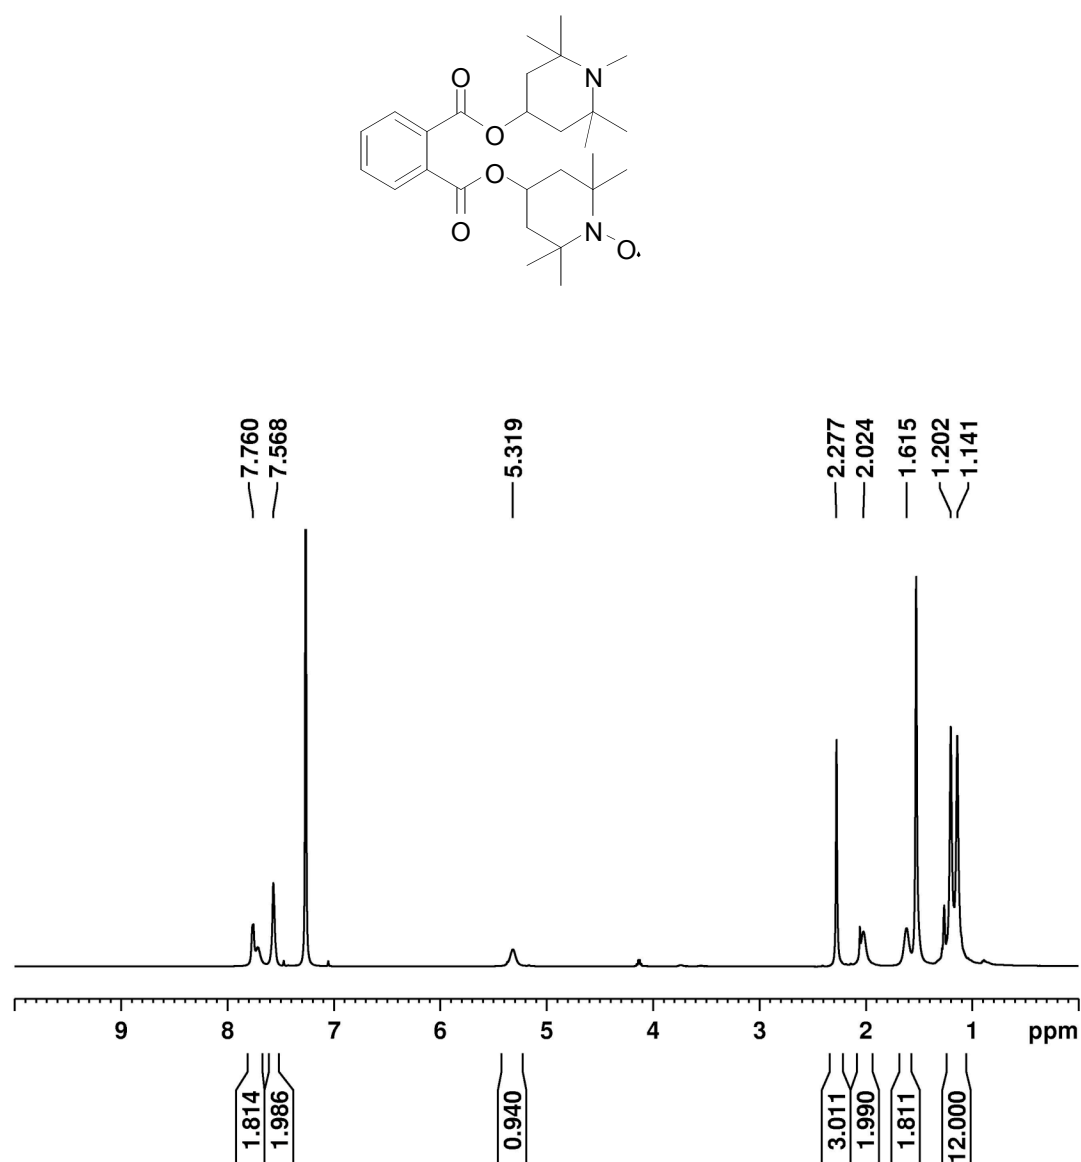

**Figure S10**  $^1\text{H}$  NMR of **4** in  $\text{CDCl}_3$  (500 MHz)

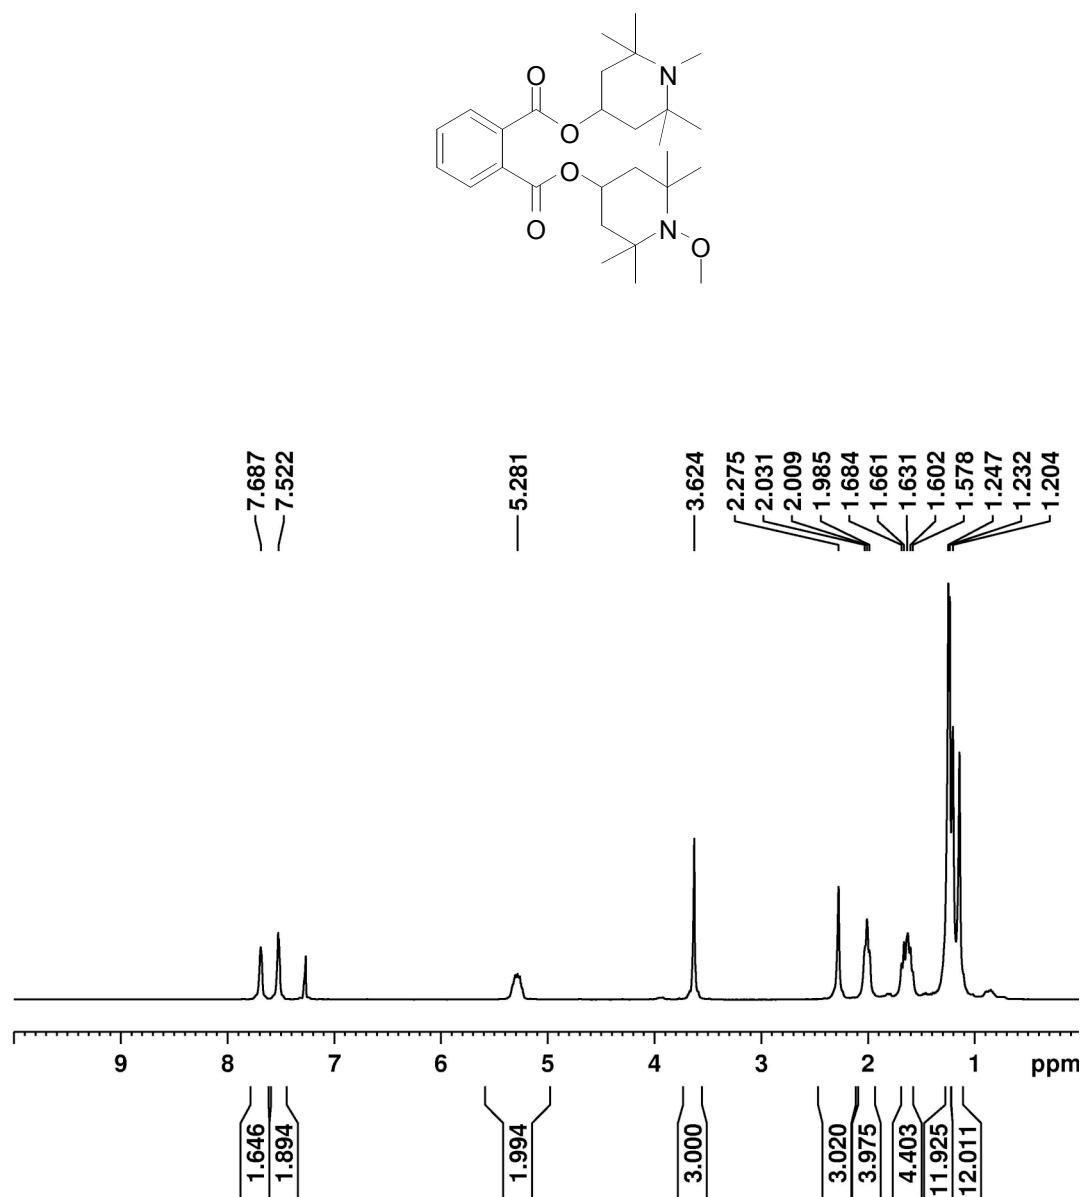

**Figure S11**  $^1\text{H}$  NMR of **5** in  $\text{CDCl}_3$  (500 MHz)

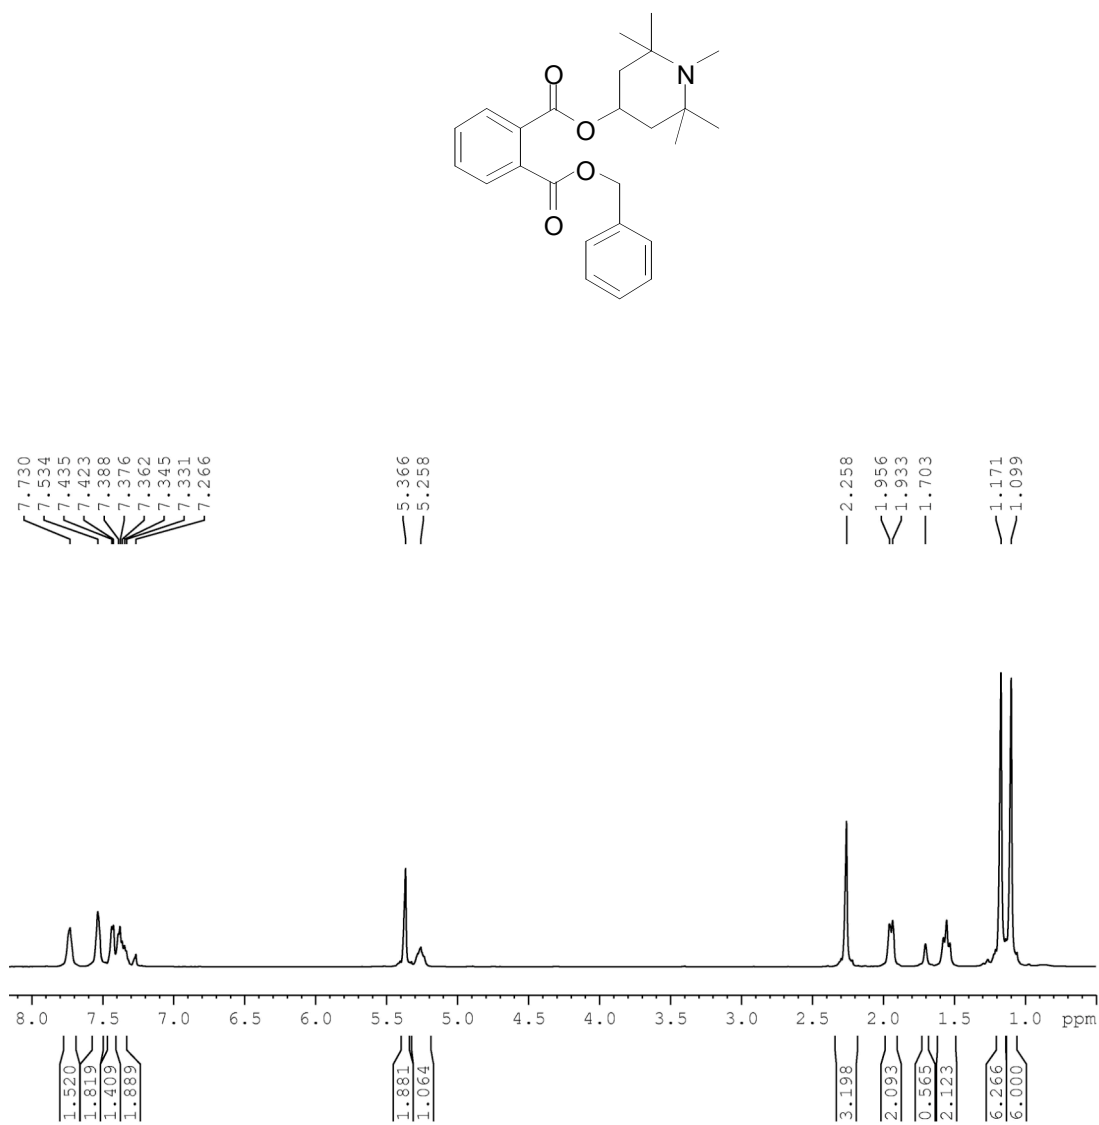

**Figure S12** <sup>1</sup>H NMR of benzyl-4-(1,2,2,6,6-pentamethylpiperidiny)phthalate (C) in CDCl<sub>3</sub> (500 MHz).

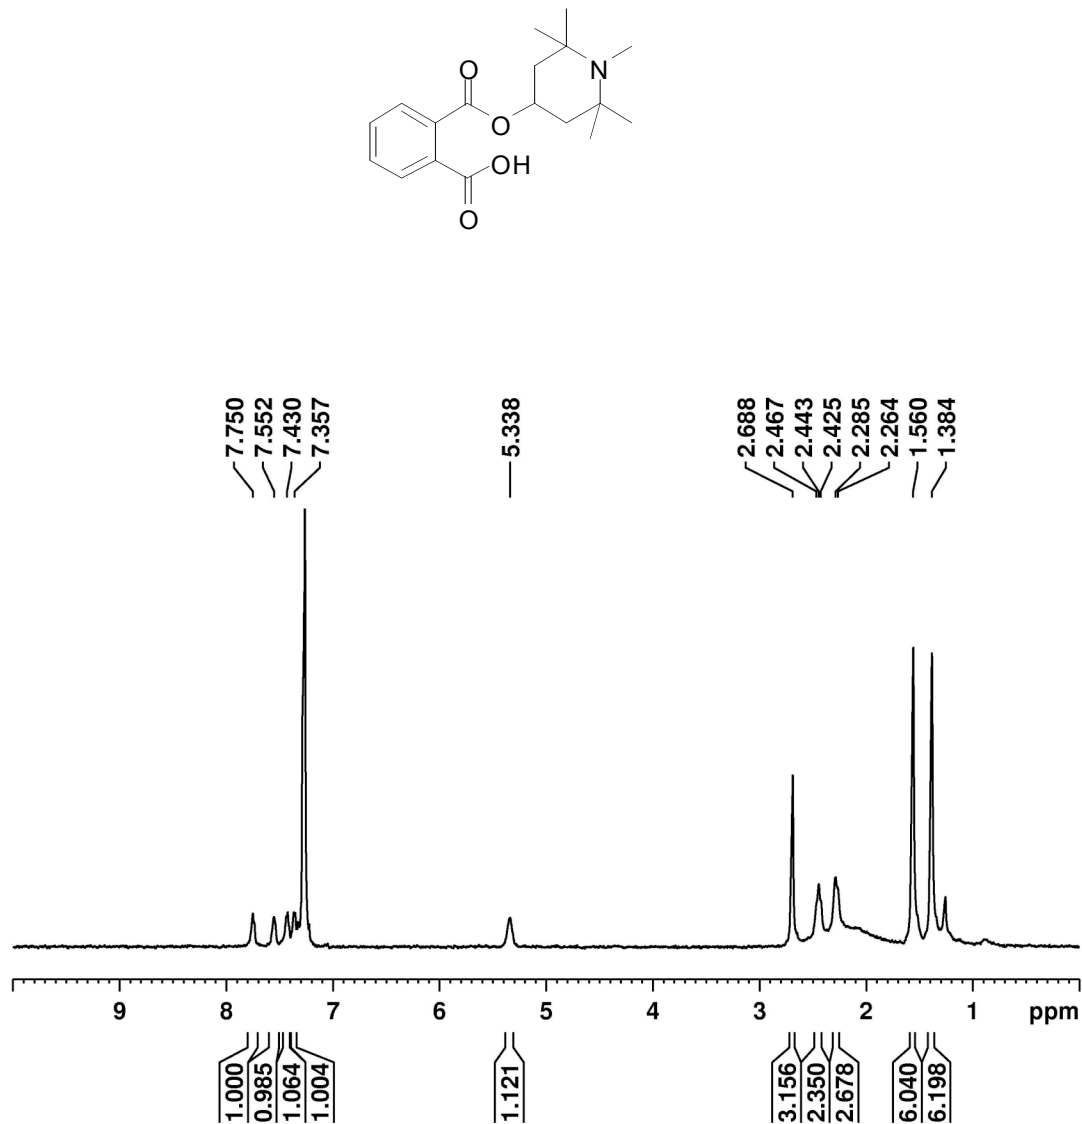

**Figure S13** <sup>1</sup>H NMR of mono-4-(1,2,2,6,6-pentamethylpiperidiny) phthalate (**D**) in CDCl<sub>3</sub> (500 MHz).

## References

- (1) Day, A.; Arnold, A. P.; Blanch, R. J.; Snushal, B. *J. Org. Chem.* **2001**, *66*, 8094.
- (2) Gutsche, C. D.; Dhawan, B.; No, K. H.; Muthukrishnan, R. *J. Am. Chem. Soc.*, **1981**, *103*, 3782.
- (3) Gutsche, C. D.; Lin, L. G.; *Tetrahedron*, **1986**, *42*, 1633.
- (4) Shinkai, S.; Mori, S.; Koreishi, H.; Tsubaki, T.; Manabe, O.; *J. Am. Chem. Soc.*, **1986**, *108*, 2409.
- (5) Sartori, E; Khudyakov, I. V.; Lei, X.; Turro, N. J. *J. Am. Chem. Soc.* **2007**, *129*, 7785-7792.
- (6) Schoening, K. –U.; Fischer, W.; Hauck, S.; Dichtl, A.; Kuepfert, M. *J. Org. Chem.* **2009**, *74*, 1567-1573.
